# Supplementary material for: Circulating Long Non-Coding RNA GAS5 Is Overexpressed in Serum from Osteoporotic Patients and Is Associated with Increased Risk of Bone Fragility
Source: MDPI journal article supplement (doi:10.3390/ijms21186930), 2020-09-21

## Supplementary Figures Legends

**Figure S1. Serum expression level of GAS5 in OP patients with vertebral fractures (OP\_VF) and femoral fractures (OP\_FF).** GAS5 expression level in the serum of 29 OP\_VF was compared to 14 OP\_FF and 28 controls (CTR). GAS5 expression level was normalized using GAPDH mRNA and relative expression values are expressed as  $2^{-\Delta Ct}$ . Individual data points represent the mean of duplicate assays for each sample. Statistical differences between groups were analysed using ANOVA with the Tukey's multiple comparison post-test analysis. \*\*\* represents a significant difference between OP\_VF and CTR ( $p < 0.001$ ) ## represents a significant difference between OP\_VF and OP\_FF ( $p < 0.01$ ).

**Figure S2. Correlation analysis of GAS5 expression level and PTH concentration in OP patients serum.** Level of GAS5 expression was positively associated with PTH concentration (pg/ml). Spearman's correlation analysis was performed. Spearman  $r = 0.2930$ ; 95% confidence interval = 0.007441 to 0.5344. \* $P < 0.05$ .

**Figure S3. Correlation analysis of PTH and 25-(OH)-VitD concentrations in OP patients serum.** Level of PTH (pg/ml) was negatively associated with PTH (pg/ml) concentration. Spearman's correlation analysis was performed. Spearman  $r = -0.3842$ ; 95% confidence interval = -0.6040 to -0.1102. \*\* $P < 0.01$ .

Supplementary Figures

Figure S1

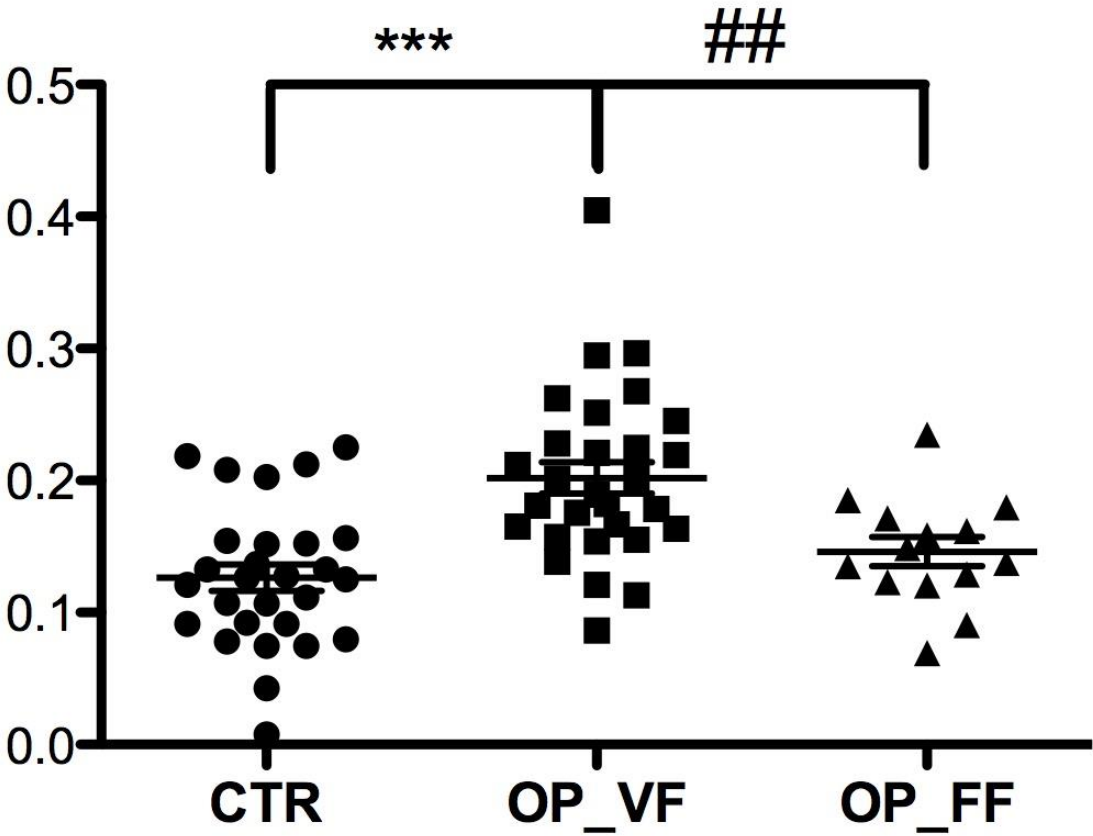

Figure S2

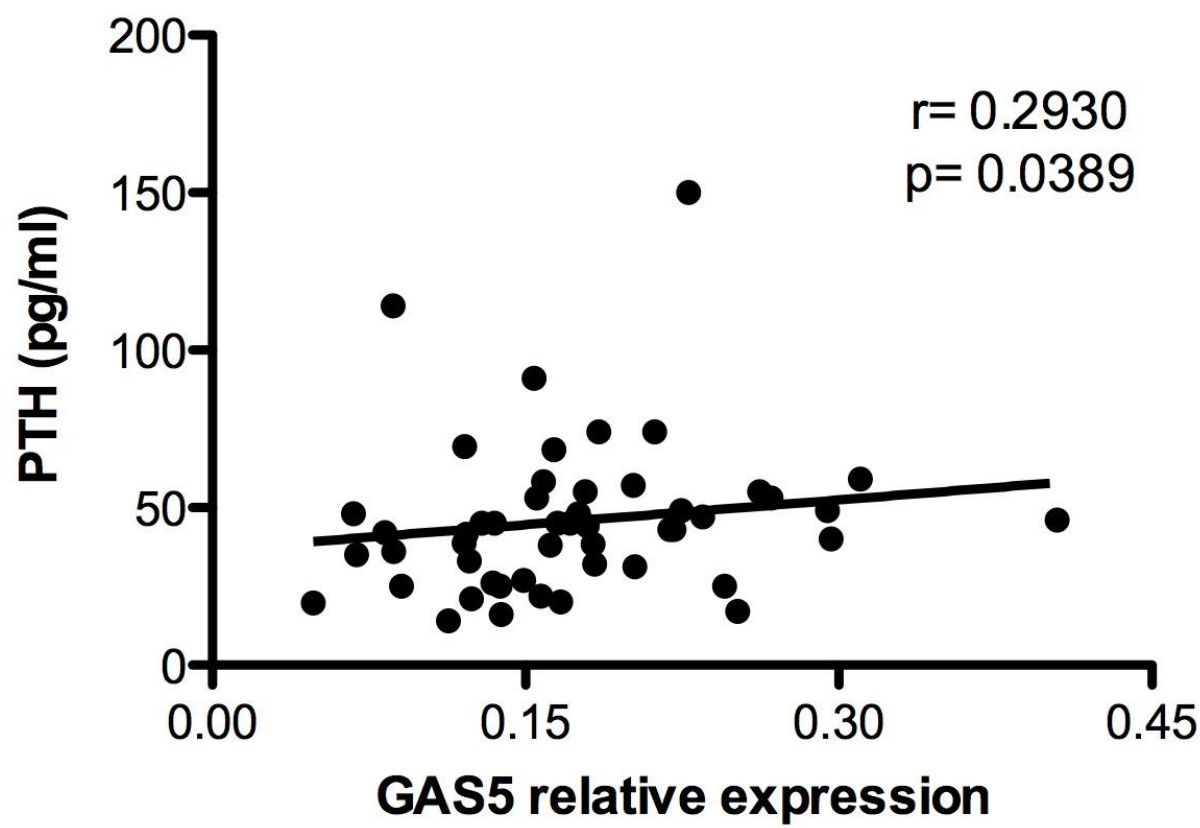

Figure S3

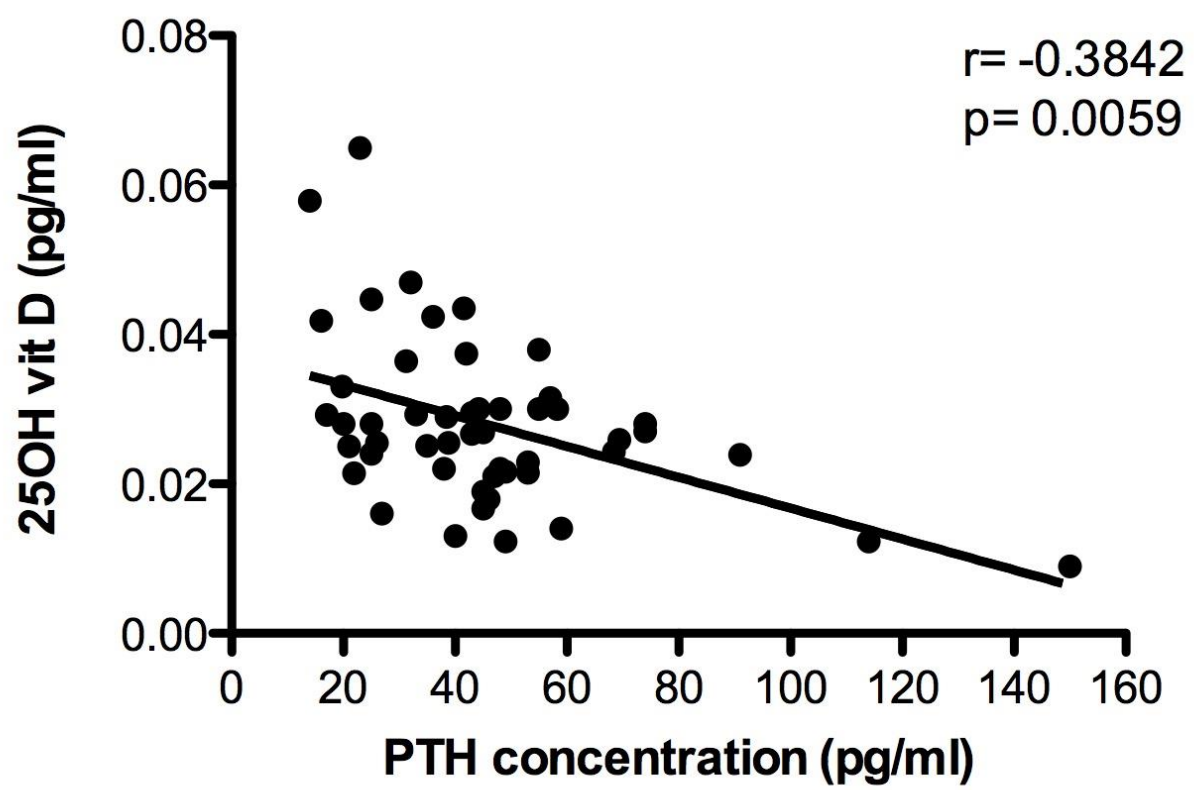

Supplement: s1 [file s1]
